# Supplementary material for: Overexpression of the transcription factors OCT4 and KLF4 improves motor function after spinal cord injury
Source: PubMed Central journal article supplement (PMC7415207; doi:10.1111/cns.13390), 2020-05-25
Supplement: CNS-26-940-s001.pdf [file CNS-26-940-s001.pdf]

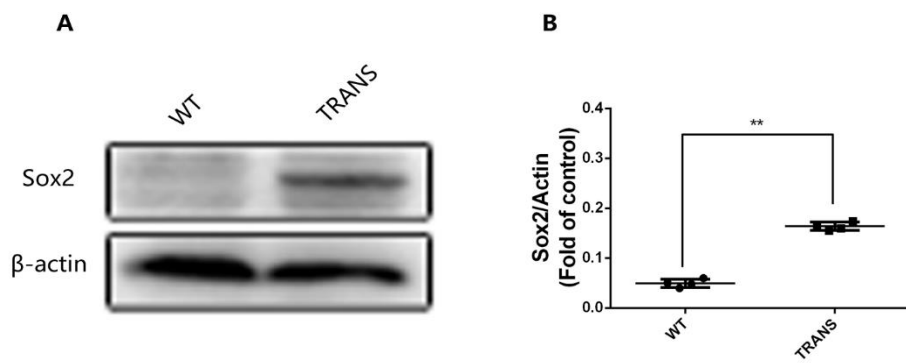

Supplementary Fig.1 Sox2 expression level increased after overexpression of OCT4 and KLF4. A) Western blotting result at day 14 induced with doxycycline; B) Qualification of part A. Data were expressed as mean  $\pm$  SEM, unpaired Student's t-test, \*\*P < 0.01, n= 4 per group.
